# Supplementary material for: Estrogen suppresses SOX9 and activates markers of female development in a human testis-derived cell line
Source: PubMed Central journal article supplement (PMC7493336; doi:10.1186/s12860-020-00307-9), 2020-09-15
Supplement: 12860_2020_307_MOESM1_ESM.pdf [file 12860_2020_307_MOESM1_ESM.pdf]

## Supplementary material

**Table 1.** Primer sequences used for qPCR

| <b>Gene</b>   | <b>Accession number</b> | <b>Forward primer (5' – 3')</b> | <b>Reverse primer (5' – 3')</b> |
|---------------|-------------------------|---------------------------------|---------------------------------|
| <i>SOX9</i>   | NM_000346.3             | ATCTGAAGAAGGAGAGCGAG            | TCAGAAGTCTCCAGAGCTTG            |
| <i>SRY</i>    | NM_003140.2             | TCAGCAAGCAGCTGGGATAC            | AACTGCAATTCTTCGGCAGC            |
| <i>AMH</i>    | NM_000479.4             | GCTGCCTTGCCCTCTCTAC             | GAACCTCAGCGAGGGTGTT             |
| <i>FGF9</i>   | NM_002010.2             | CTCCTGGGTTGACACCATCAT           | CAGAATGCCAAATCGGCTG             |
| <i>PTGDS</i>  | NM_000954.5             | CCTGCCCCAAACCGATAAGT            | CAGAGACATCCAGAGCGTGG            |
| <i>FOXL2</i>  | NM_023067.3             | GGACGGACCAATACGTGTGT            | ACTGATAGCGGAGGAAACGC            |
| <i>WNT4</i>   | NM_030761.4             | GTCTTCGCCGTCTTCTCAGC            | GGAACTGGTACTGGCACTCC            |
| <i>CHMP2A</i> | NM_014453.3             | GGACCCTGTCGTCAACATCG            | TGTGCCATCGAGTTGTTGGA            |
| <i>TBP</i>    | NM_003194.4             | AGCGCAAGGGTTTCTGGTTT            | CTGAATAGGCTGTGGGGTCA            |
